# Supplementary material for: Purified Smc5/6 Complex Exhibits DNA Substrate Recognition and Compaction
Source: PubMed Central journal article supplement — Mol Cell. 2020 Dec 17;80(6):1039–1054.e6. doi: 10.1016/j.molcel.2020.11.012 (PMC7758880; doi:10.1016/j.molcel.2020.11.012), 2020-12-17
Supplement: mmc1.pdf [file mmc1.pdf]

**Molecular Cell, Volume 80**

## **Supplemental Information**

### **Purified Smc5/6 Complex Exhibits DNA**

### **Substrate Recognition and Compaction**

**Pilar Gutierrez-Escribano, Silvia Hormeño, Julene Madariaga-Marcos, Roger Solé-Soler, Francis J. O'Reilly, Kyle Morris, Clara Aicart-Ramos, Ricardo Aramayo, Alex Montoya, Holger Kramer, Juri Rappsilber, Jordi Torres-Rosell, Fernando Moreno-Herrero, and Luis Aragon**

## **Supplemental Information**

### **Purified Smc5/6 complex exhibits DNA substrate recognition and compaction**

Pilar Gutierrez-Escribano, Silvia Hormeño, Julene Madariaga-Marcos, Roger Solé-Soler, Francis J. O'Reilly, Kyle Morris, Clara Aicart-Ramos, Ricardo Aramayo, Alex Montoya, Holger Kramer, Juri Rappsilber, Jordi Torres-Rosell, Fernando Moreno-Herrero, and Luis Aragon.

Supplementary Fig. 1

**A**

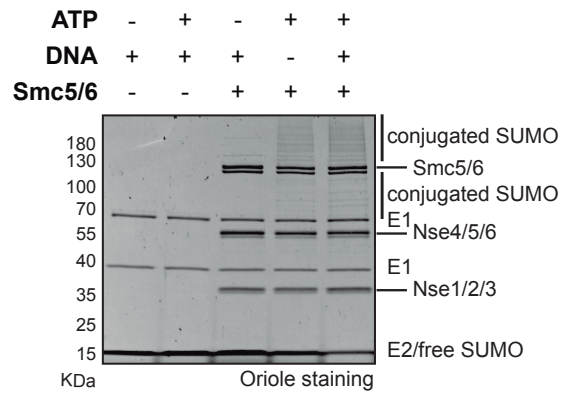

**B**

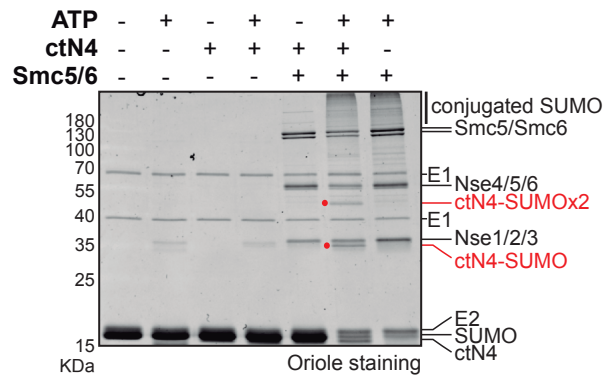

**Supplementary Figure 1. Purified Smc5-6 complexes contain an active SUMO ligase. Related to Figure 1.** (A) Oriole staining of SUMOylation reactions described in Figure 1D containing 150 nM E1, 100 nM E2 and 16  $\mu$ M SUMO. Reactions were started by addition of 2 mM ATP and allowed to proceed for 15 min before being stopped by addition of SDS-PAGE loading buffer and boiling. Where indicated (+), Smc5/6 and DNA were added to 165 nM and 10 mM, respectively. (B) Oriole staining of ctN4 (c-terminal domain of Nse4) SUMOylation in the presence and absence of the Smc5/6 complex. Reactions were started by addition of 2mM ATP and allowed to progress for 30 minutes. Note that mono and di-sumoylated ctN4 species accumulate to a higher extent in the presence of Smc5/6 complex. ctN4-SUMO=monosumoylated ctN4; ctN4-SUMO<sub>2</sub>= disumoylated ctN4. Red dots mark the position of sumoylated ctN4 species.

## Supplementary Fig. 2

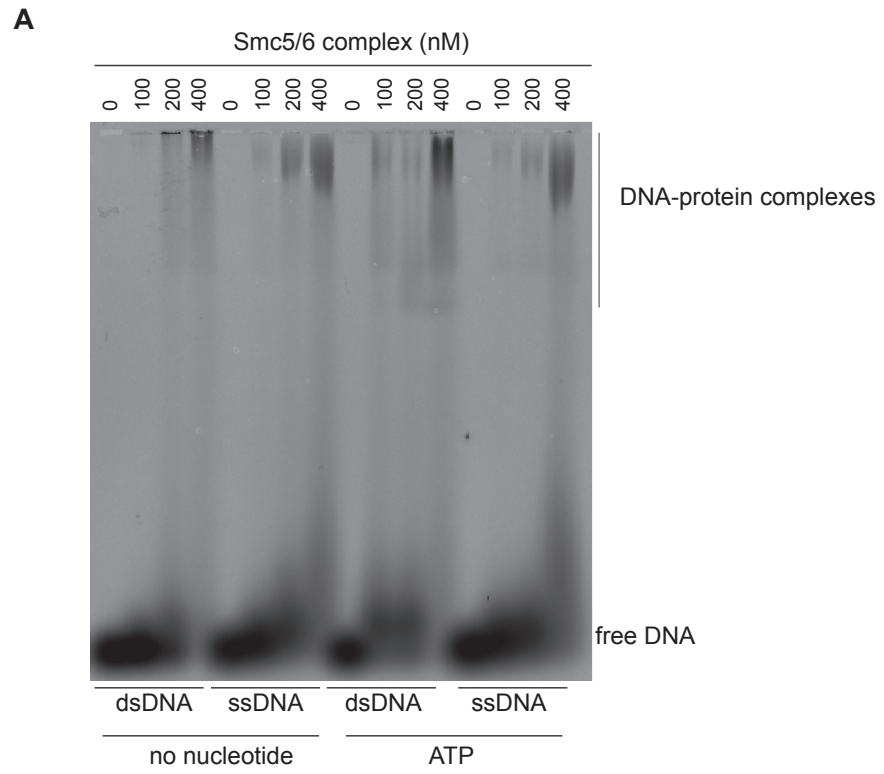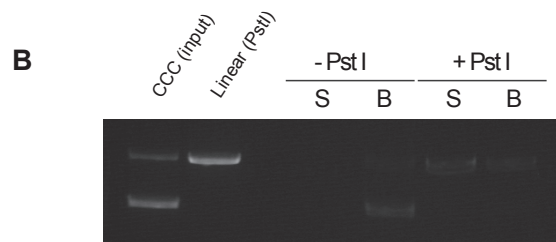

**Supplementary Figure 2. DNA binding of Smc5/6 complex using an electrophoretic mobility shift assay. Related to Figure 4. (A)** 50nM of 6-carboxyfluorescein-labelled ssDNA and dsDNA were incubated with increasing concentrations of Smc5/6 complex, as indicated. **(B)** Agarose gel electrophoresis showing recovered DNA after Smc5/6 complex loading and immunoprecipitation in the absence and presence of digestion with the restriction enzyme *Pst*I to linearise circular DNA bound so Smc5/6 complex.

Supplementary Fig. 3

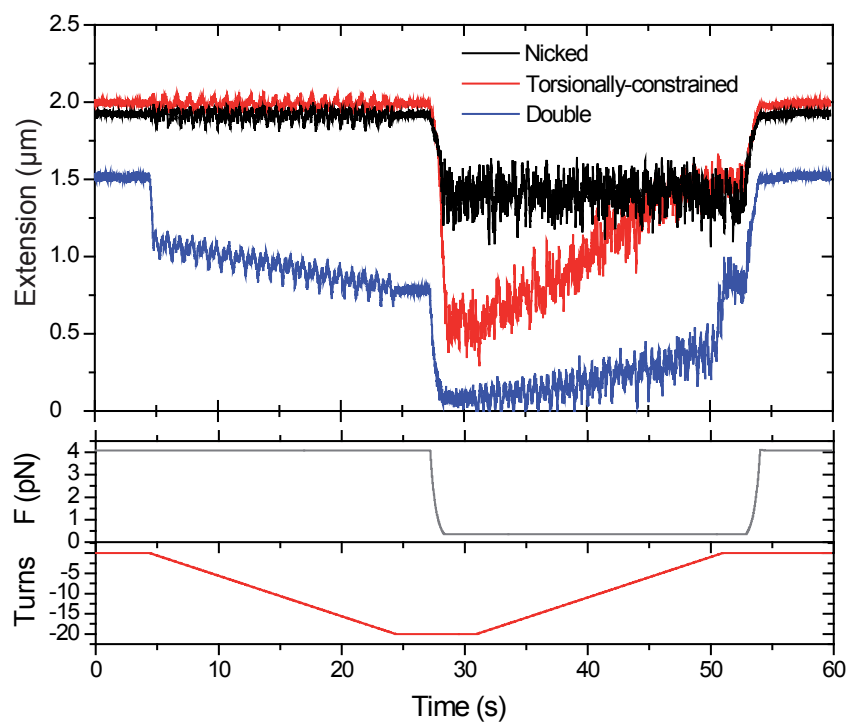

**Supplementary Figure 3. Mechanical response of nicked, torsionally constrained and double DNA molecules. Related to [Figure 5](#).** Example of a characterization experiment carried out in buffer, before the addition of proteins and ATP.



Supplementary Fig. 4

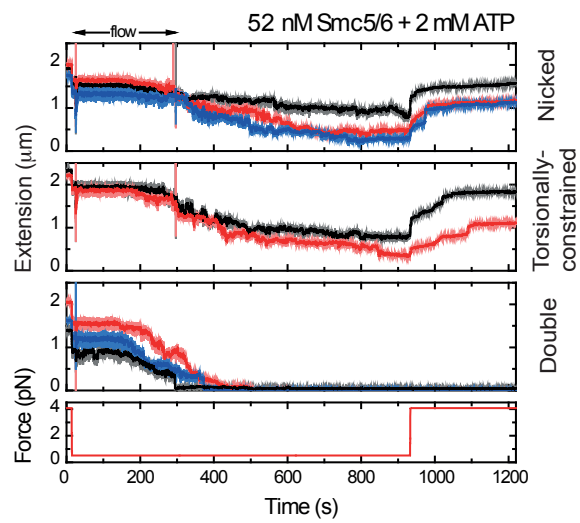

**Supplementary Figure 4. DNA compaction experiment at 52 nM Smc5/6 and 0.5 pN. Related to Figure 5.** A sample containing 52nM of Smc5/6 and 2 mM ATP is introduced at 0.5 pN while monitoring the extension of different DNA tethers at the same time. A stepwise compaction (total or partial) of the tethers is observed. At the end of the experiment, the force increases to 4 pN and the initial DNA extension is only partially recovered.

Supplementary Fig. 5

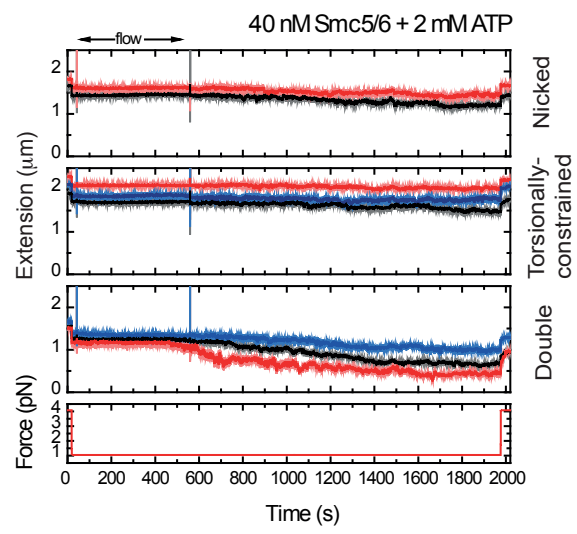

**Supplementary Figure 5. DNA compaction experiment at 40 nM Smc5/6 and 1 pN. Related to Figure 5.** Example of an experiment where a sample containing 40 nM Smc5/6 with 2 mM ATP is first introduced at 1 pN while monitoring the DNA extension. Slow condensation of the tethers is observed. At the end of the experiment, the force increases to 4 pN and the initial DNA extension is only partially recovered.

### Supplementary Fig. 6

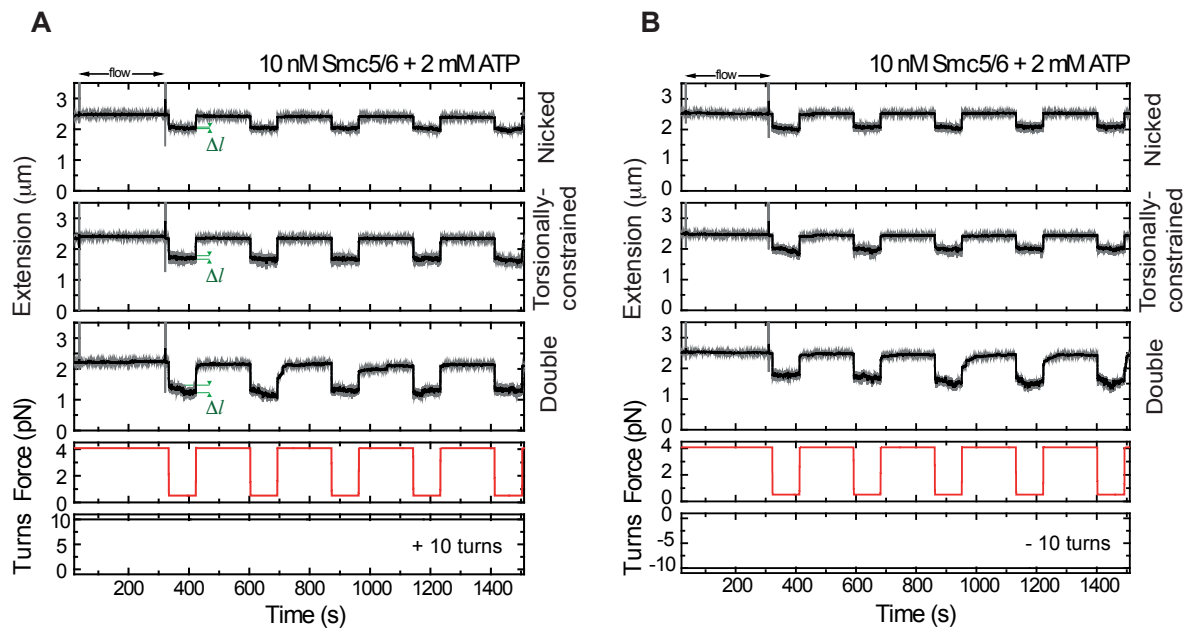

**Supplementary Figure 6. DNA condensation as function of topological state of DNA. Related to Figure 6.** Illustrative example of individual condensation traces of single nicked, single torsionally constrained and double tethers when the initial topological state of the DNA is altered by +10 (**A**) or -10 (**B**) turns. We allowed DNA compaction by 10 nM Smc5/6 at a low force (0.5 pN) for 90 seconds and the force was afterwards raised to 4 pN for 180 seconds. The cycle was repeated 5 times per experiment. DNA compaction was quantified by comparing the initial extension of the molecule to the minimum extension value in each step ( $\Delta l$ ).

# Supplementary Fig. 7

**A**

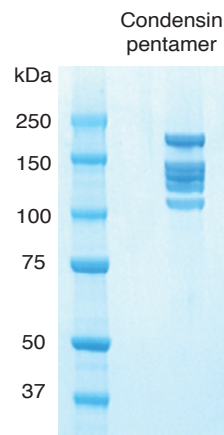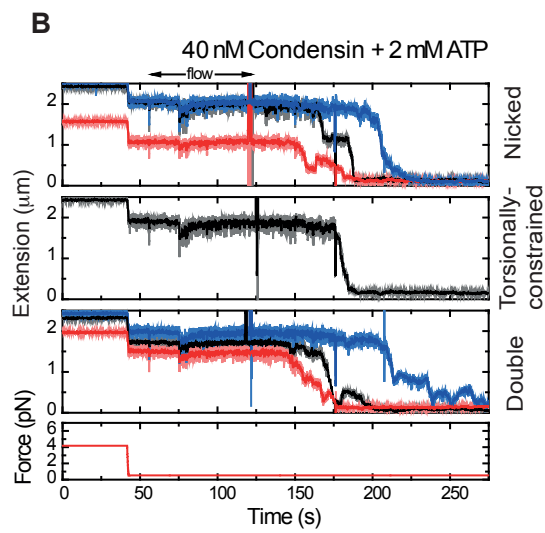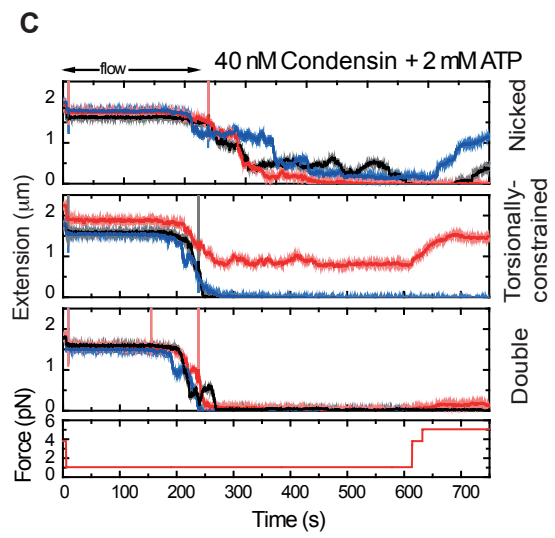

**Supplementary Figure 7. Condensation curves of *S. cerevisiae* condensin complex. Related to Figure 6. (A)** SDS-PAGE and Coomassie Blue staining of purified condensin pentameric complex. **(B)** and **(C)** Magnetic tweezers experiments where 40 nM condensin and 2 mM ATP are added at 0.5 pN **(B)** and 1 pN **(C)** while monitoring the DNA extension. Robust condensation of the DNA tethers is observed in both cases.
